# Supplementary material
Source: Research Square preprint supplement (doi:10.21203/rs.3.rs-9692910/v1)
Supplement: Supplementary file 1 [file dca9fcec7b5f2975e1ea513b.pdf]

*Supplementary material on*

**Increase in Delhi's air pollution linked with global energy crisis  
due to West Asia War**

Avik Kumar Sam<sup>1</sup>, Kounik De Sarkar<sup>1</sup>, Abhinav Sharma<sup>2</sup>, Navinya Chimurkar<sup>3</sup>, Harish C.  
Phuleria<sup>1,2\*</sup>

1. Environmental Science and Engineering Department, Indian Institute of Technology Bombay, Mumbai, India
2. Centre in Climate Studies, Indian Institute of Technology Bombay, Mumbai, India
3. Department of Biological and Chemical Engineering, Aarhus University, Denmark

\* Corresponding author: Harish C. Phuleria; [phuleria@iitb.ac.in](mailto:phuleria@iitb.ac.in)

**Table S1:** List of stations and their details.

| <b>Station</b>                     | <b>Latitude</b> | <b>Longitude</b> | <b>Number of Restaurants</b> | <b>Classification</b> | <b>Type</b> |
|------------------------------------|-----------------|------------------|------------------------------|-----------------------|-------------|
| DTU                                | 28.75           | 77.1112615       | 0                            | 0-5 Low               | Academic    |
| Jawaharlal Nehru Stadium           | 28.5803         | 77.233829        | 0                            | 0-5 Low               | Stadium     |
| Dwarka Sector-8                    | 28.571          | 77.0719006       | 0                            | 0-5 Low               | Residential |
| Rohini                             | 28.7325         | 77.11992         | 0                            | 0-5 Low               | Residential |
| Narela                             | 28.8228         | 77.101981        | 0                            | 0-5 Low               | Commercial  |
| Major Dhyan Chand National Stadium | 28.6113         | 77.237738        | 7                            | 6-10 Mid              | Stadium     |
| Lodhi Road                         | 28.5918         | 77.2273074       | 9                            | 6-10 Mid              | Residential |
| Vivek Vihar                        | 28.6723         | 77.31526         | 9                            | 6-10 Mid              | Residential |
| Anand Vihar                        | 28.6476         | 77.315809        | 8                            | 6-10 Mid              | Commercial  |
| Nehru Nagar                        | 28.5679         | 77.250515        | 7                            | 6-10 Mid              | Academic    |
| Okhla Phase-2                      | 28.5308         | 77.271255        | 13                           | >10 High              | Commercial  |
| Chandni Chowk                      | 28.6568         | 77.227234        | 15                           | >10 High              | Residential |
| Shadipur                           | 28.6515         | 77.1473105       | 16                           | >10 High              | Residential |
| ITO                                | 28.6286         | 77.24106         | 35                           | >10 High              | Commercial  |
| Punjabi Bagh                       | 28.674          | 77.131023        | 30                           | >10 High              | Residential |
| Sonia Vihar                        | 28.7105         | 77.249485        | 19                           | >10 High              | Residential |

**Table S2:** List of stations and their details.

| <b>Station Name</b>                           | <b>CO % Change</b> | <b>NOx % Change</b> | <b>PM<sub>10</sub> % Change</b> | <b>SO<sub>2</sub> % Change</b> | <b>Type</b> |
|-----------------------------------------------|--------------------|---------------------|---------------------------------|--------------------------------|-------------|
| DTU (0)                                       | -8.70              | -15.20              | -58.60                          | -0.86                          | Academic    |
| DWARKA SECTOR-8 (0)                           | 8.70               | 11.26               | -3.93                           | 187.33                         | Residential |
| JAWAHARLAL NEHRU STADIUM (0)                  | 6.96               | -29.41              | 42.77                           | -15.43                         | Stadium     |
| NARELA (0)                                    | 22.07              | -29.77              | -3.79                           | -7.17                          | Commercial  |
| ROHINI (0)                                    | 4.72               | -43.77              | 17.00                           | -6.36                          | Residential |
| MAJOR DHYAN CHAND NATIONAL STADIUM (6-10 Low) | 33.40              | -21.59              | 26.04                           | 122.00                         | Stadium     |
| NEHRU NAGAR (6-10 Low)                        | 70.80              | -18.53              | 35.95                           | 44.26                          | Academic    |
| ANAND VIHAR (6-10 Low)                        | 22.05              | -56.53              | 28.73                           | 13.80                          | Commercial  |
| LODHI ROAD (6-10 Low)                         | 5.48               | -17.42              | 24.99                           |                                | Residential |
| VIVEK VIHAR (6-10 Low)                        | 26.00              | -20.71              | 21.75                           | -16.53                         | Residential |
| OKHLA PHASE-2 (>10 High)                      | 74.67              | 9.85                | 12.97                           | 15.39                          | Commercial  |
| CHANDNI CHOWK (>10 High)                      | 11.97              | -33.13              | 54.66                           | 32.00                          | Residential |
| SHADIPUR (>10 High)                           | 33.14              | -29.33              | -7.28                           | -17.64                         | Residential |
| SONIA VIHAR (>10 High)                        | 14.89              | -38.59              | 12.29                           | 39.11                          | Residential |
| PUNJABI BAGH (>10 High)                       | 4.31               | -38.48              | 62.89                           | -3.03                          | Residential |
| ITO (>10 High)                                | -3.04              | -22.08              | 10.52                           | -28.82                         | Commercial  |

### West Asia War Impact: $PM_{10}$ changes by Peak Period & Density Group

Percentage changes from Baseline to 2026 West Asia War (Feb-Mar Comparison)

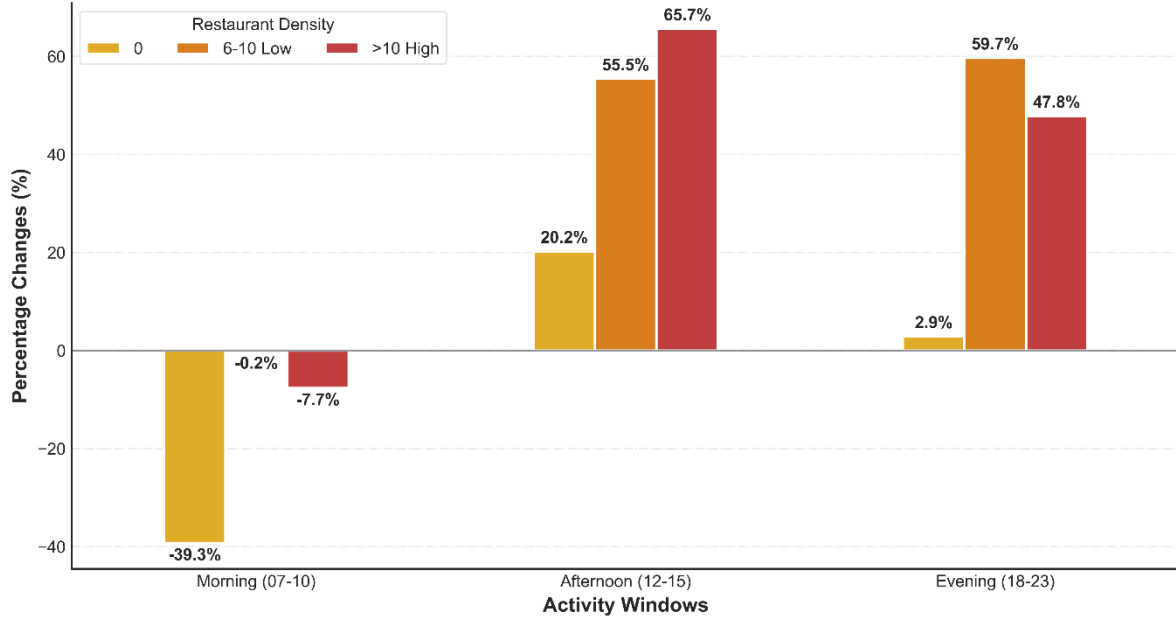

**Figure S1:** Changes observed in  $PM_{10}$  concentrations across peak periods and density groups.

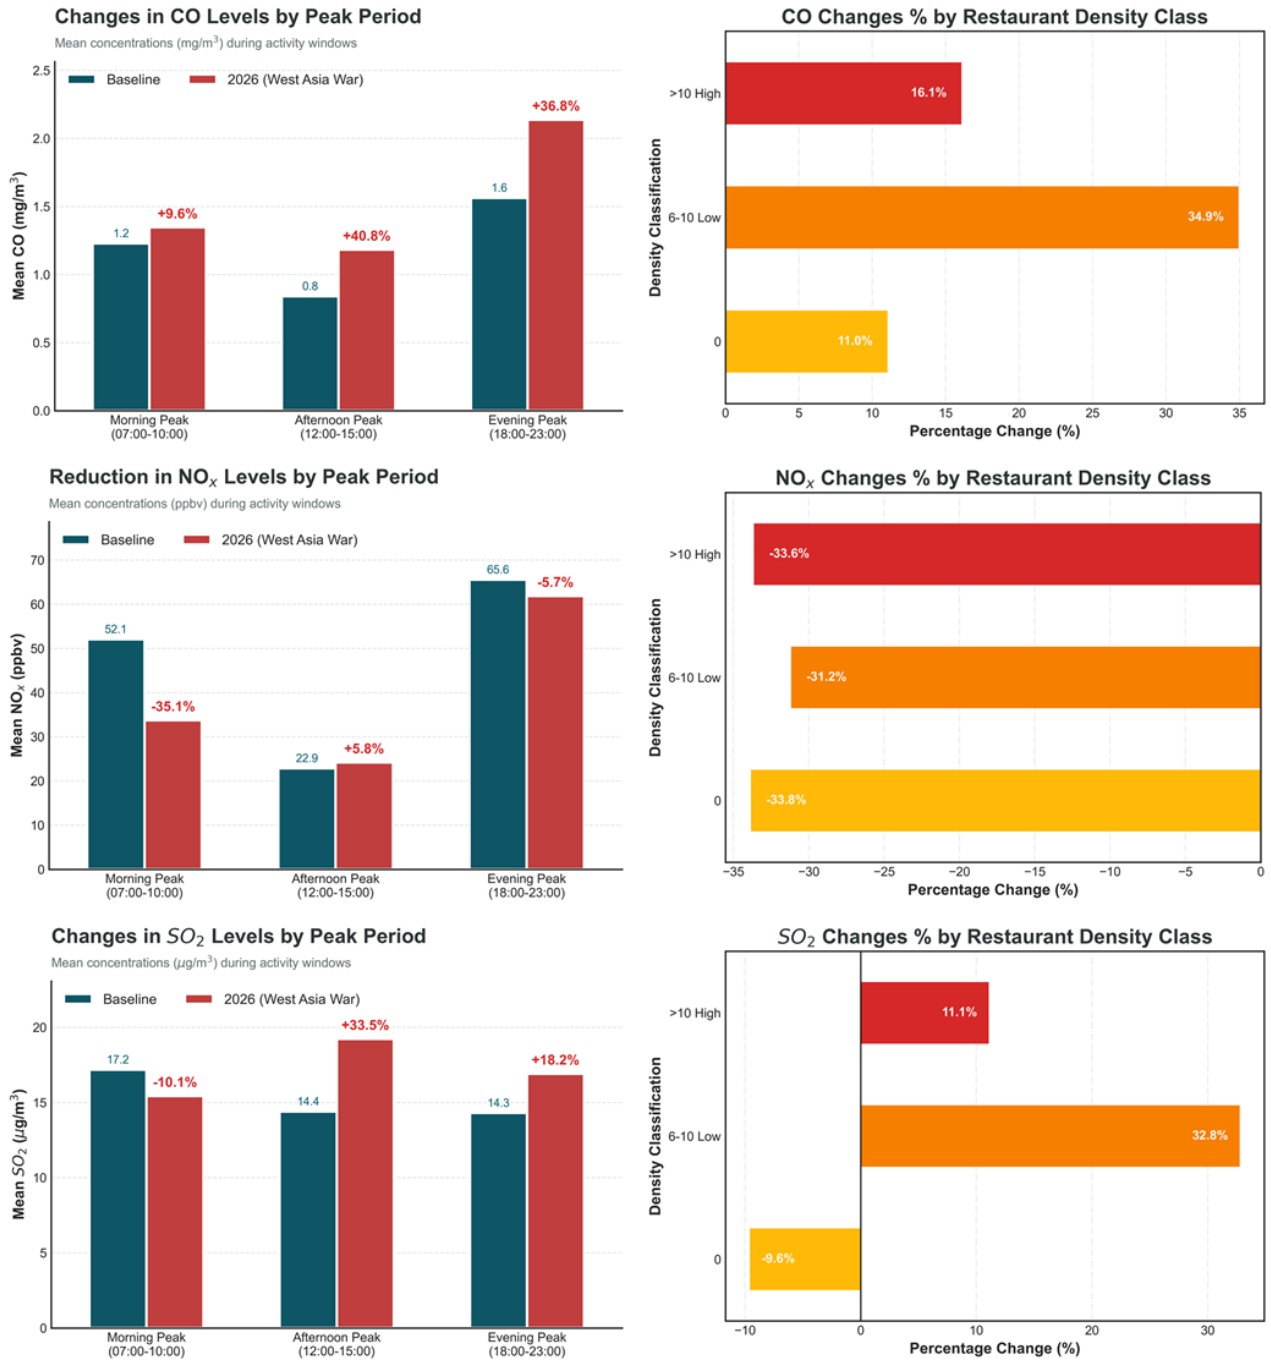

**Figure S2:** Changes observed in CO, NO<sub>x</sub> and SO<sub>2</sub> across peak periods and restaurant density classes.

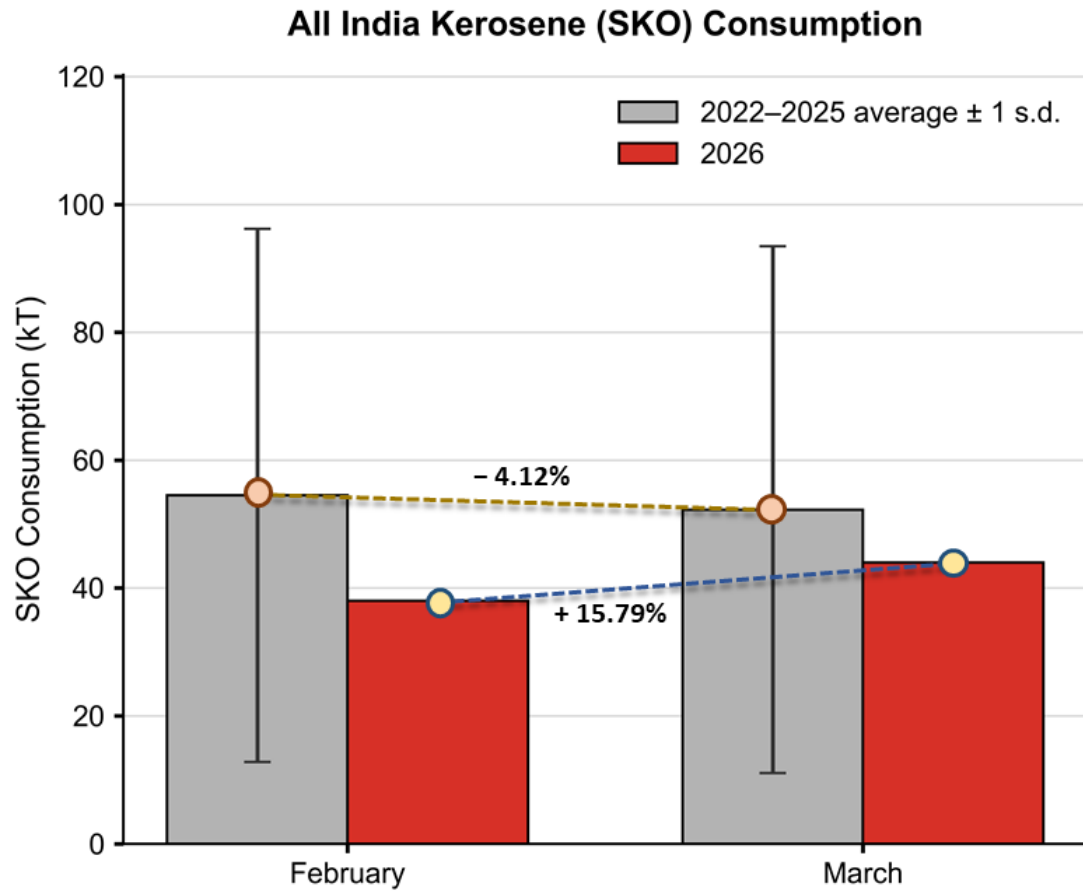

**Figure S3:** Changes observed in CO, NO<sub>x</sub> and SO<sub>2</sub> across peak periods and restaurant density classes (Source: Petroleum Planning & Analysis Cell, 2026).
